# Supplementary material for: Rationale design, synthesis, cytotoxicity evaluation, andin silicomechanistic studies of novel 1,2,3-triazoles with potential anticancer activity
Source: Royal Society of Chemistry journal article supplement (doi:10.1039/d2nj02061k), 2022-01-01
Supplement: d2nj02061k1.pdf [file d2nj02061k1.pdf]

## Rationale Design, Synthesis, Cytotoxicity Evaluation, and In silico Mechanistic Studies of Novel 1,2,3-Triazoles with Potential Anticancer Activity

Esraa M. Othman<sup>a</sup>, Eman A. Fayed<sup>a</sup>, Ebtahal M. Hussein<sup>a</sup>, Hamada S. Abulkhair<sup>b,c\*</sup>

<sup>a</sup> *Pharmaceutical Organic Chemistry Department, Faculty of Pharmacy (Girls), Al-Azhar University, Nasr City 11754, Cairo, Egypt*

<sup>b</sup> *Pharmaceutical Organic Chemistry Department, Faculty of Pharmacy (Boys), Al-Azhar University, Nasr City 11884, Cairo, Egypt*

<sup>c</sup> *Pharmaceutical Chemistry Department, Faculty of Pharmacy, Horus University-Egypt, International Coastal Road, New Damietta 34518, Egypt*

---

### Supporting Information

#### List of Contents

|     |                                                       |    |
|-----|-------------------------------------------------------|----|
| 1   | Spectral Data of New Compounds .....                  | 3  |
| 1.1 | Spectral Data of 14.....                              | 3  |
| 1.2 | Spectral Data of 16.....                              | 4  |
| 1.3 | Spectral Data of 17.....                              | 5  |
| 1.4 | Spectral Data of 20.....                              | 6  |
| 1.5 | Spectral Data of 21.....                              | 7  |
| 1.6 | Spectral Data of 22.....                              | 8  |
| 2   | Docking Study.....                                    | 8  |
| 2.1 | Sorafenib Re-docked .....                             | 8  |
| 2.2 | Results of docking experiment of 14 with VEGFR-2..... | 10 |
| 2.3 | Results of docking experiment of 15 with VEGFR-2..... | 11 |
| 2.4 | Results of docking experiment of 16 with VEGFR-2..... | 12 |
| 2.5 | Results of docking experiment of 17 with VEGFR-2..... | 13 |
| 2.6 | Results of docking experiment of 20 with VEGFR-2..... | 14 |
| 2.7 | Results of docking experiment of 21 with VEGFR-2..... | 15 |
| 2.8 | Results of docking experiment of 22 with VEGFR-2..... | 16 |

|     |                                  |    |
|-----|----------------------------------|----|
| 3   | ADMET Profiling Study .....      | 17 |
| 3.1 | ADMET Profile of 14 .....        | 17 |
| 3.2 | ADMET Profile of 15 .....        | 19 |
| 3.3 | ADMET Profile of 16 .....        | 22 |
| 3.4 | ADMET Profile of 17 .....        | 25 |
| 3.5 | ADMET Profile of 20 .....        | 28 |
| 3.6 | ADMET Profile of 21 .....        | 31 |
| 3.7 | ADMET Profile of 22 .....        | 34 |
| 3.8 | ADMET Profile of Sorafenib ..... | 37 |

# 1 Spectral Data of New Compounds

## 1.1 Spectral Data of 14

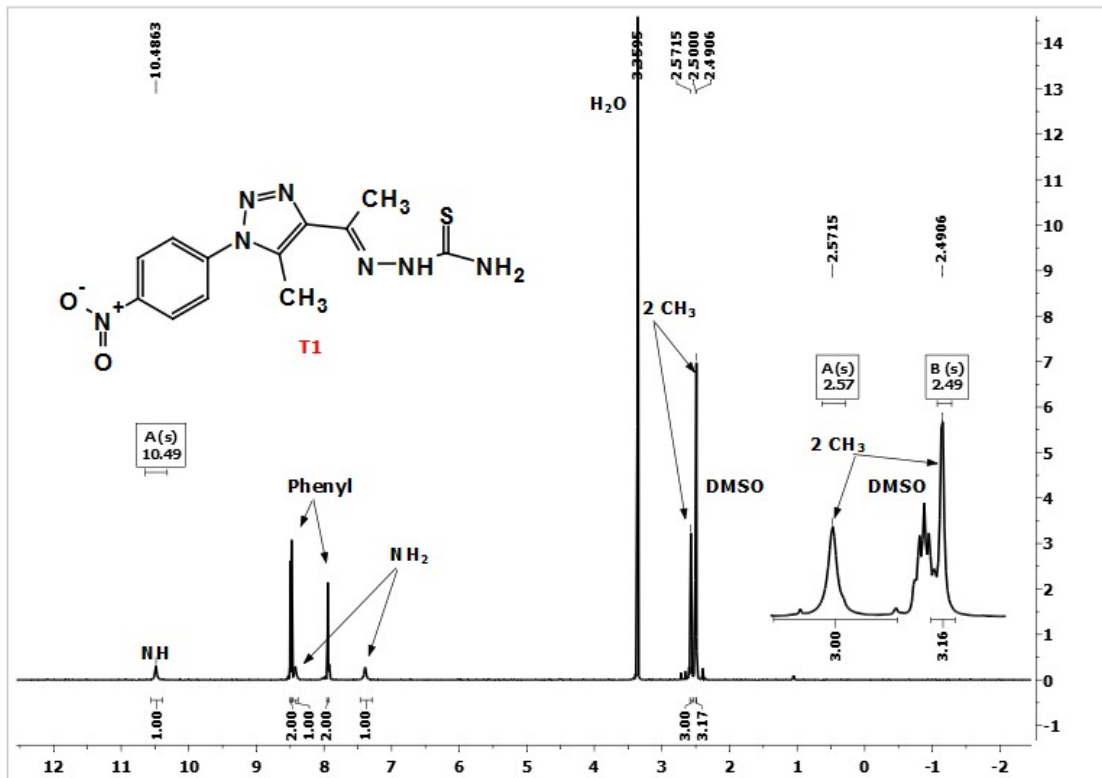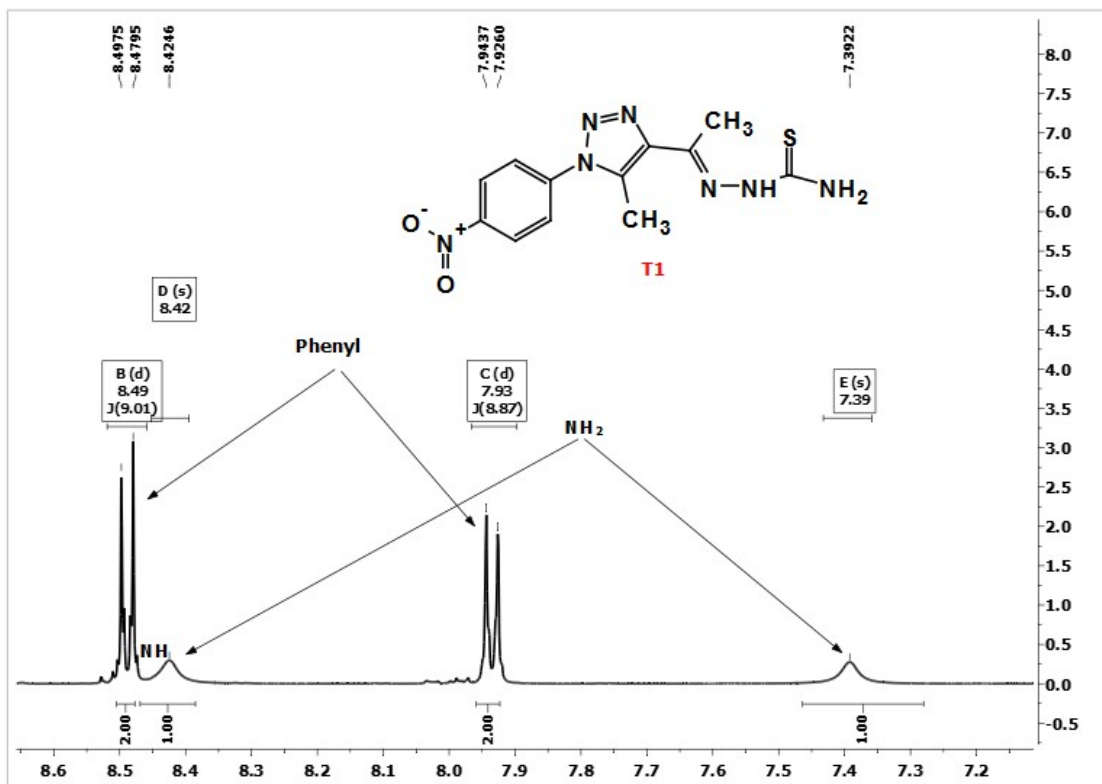

## 1.2 Spectral Data of 16

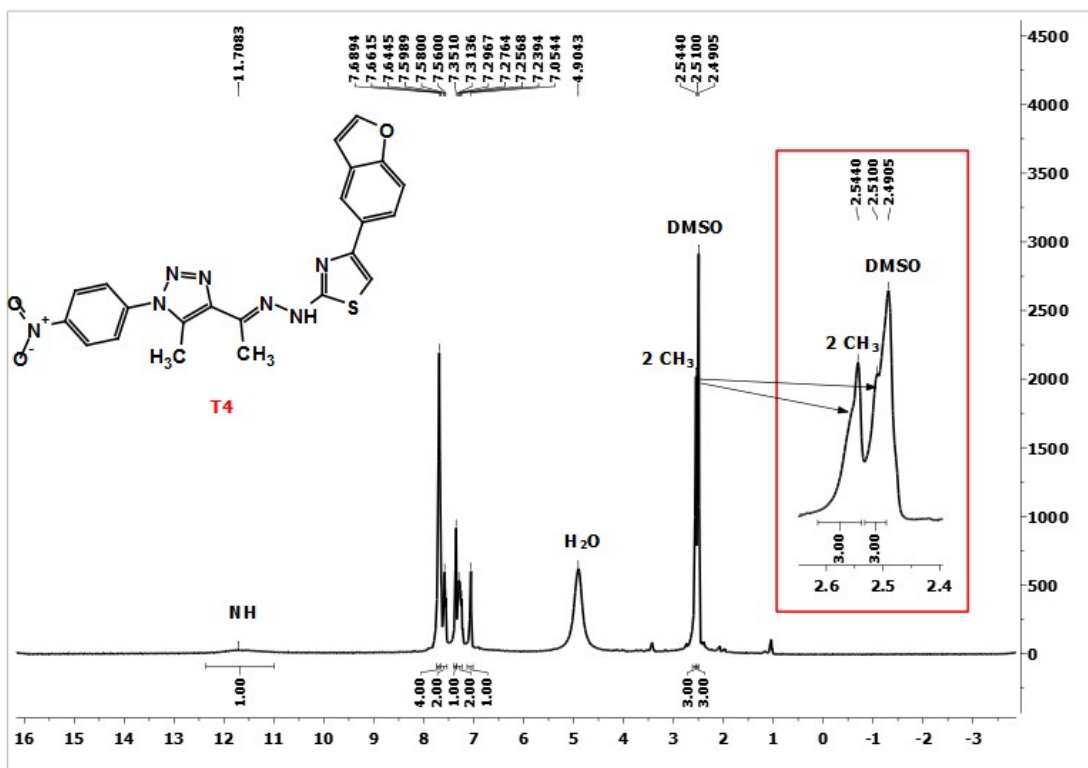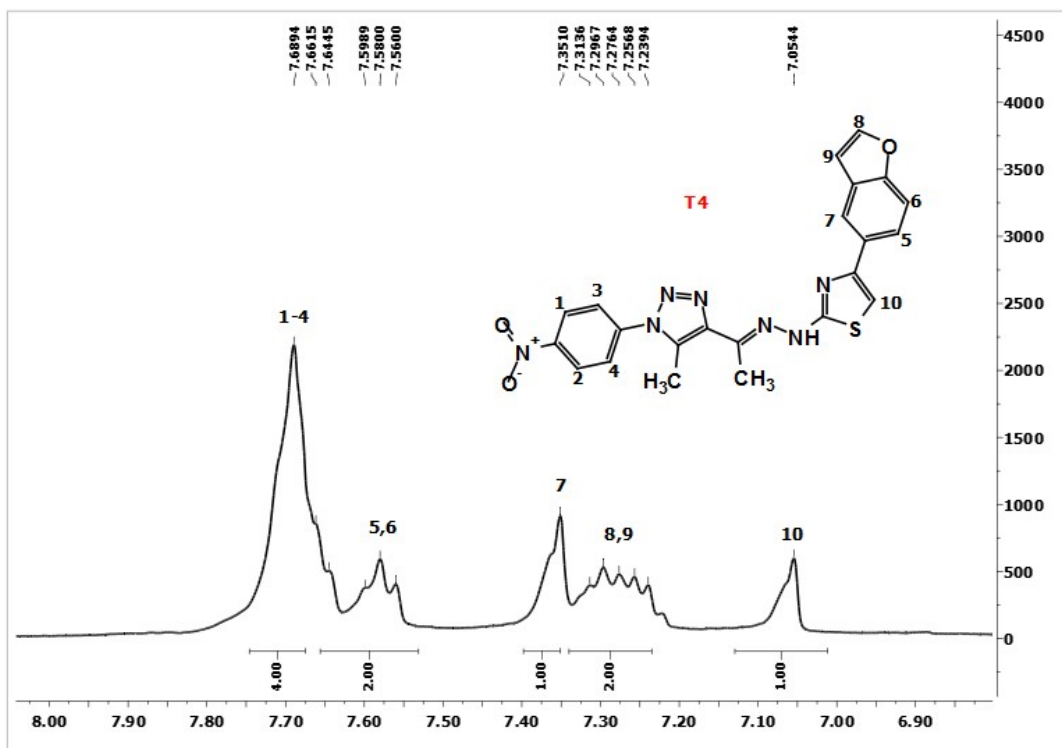

### 1.3 Spectral Data of 17

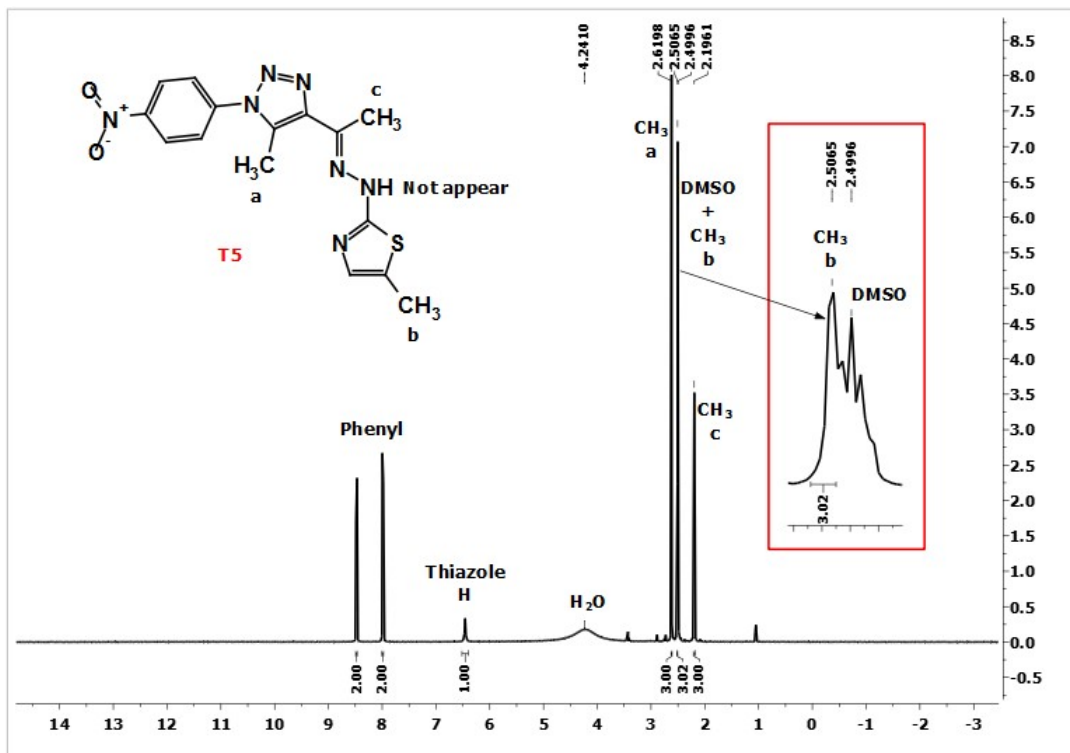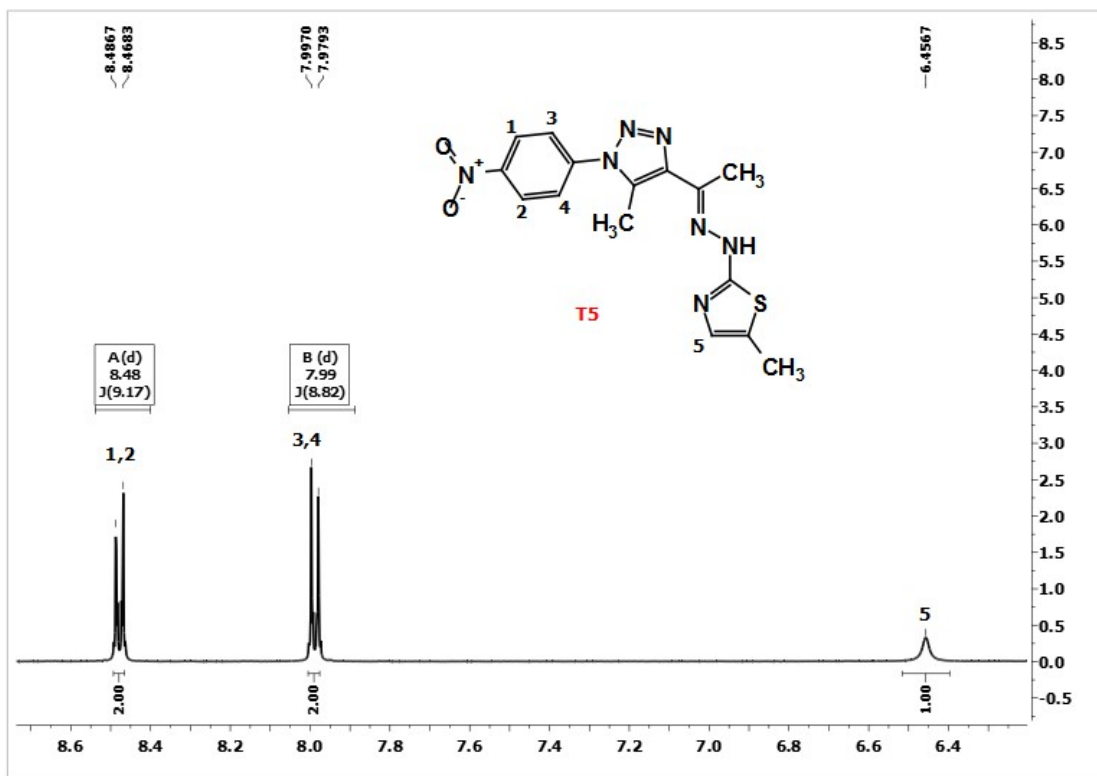

## 1.4 Spectral Data of 20

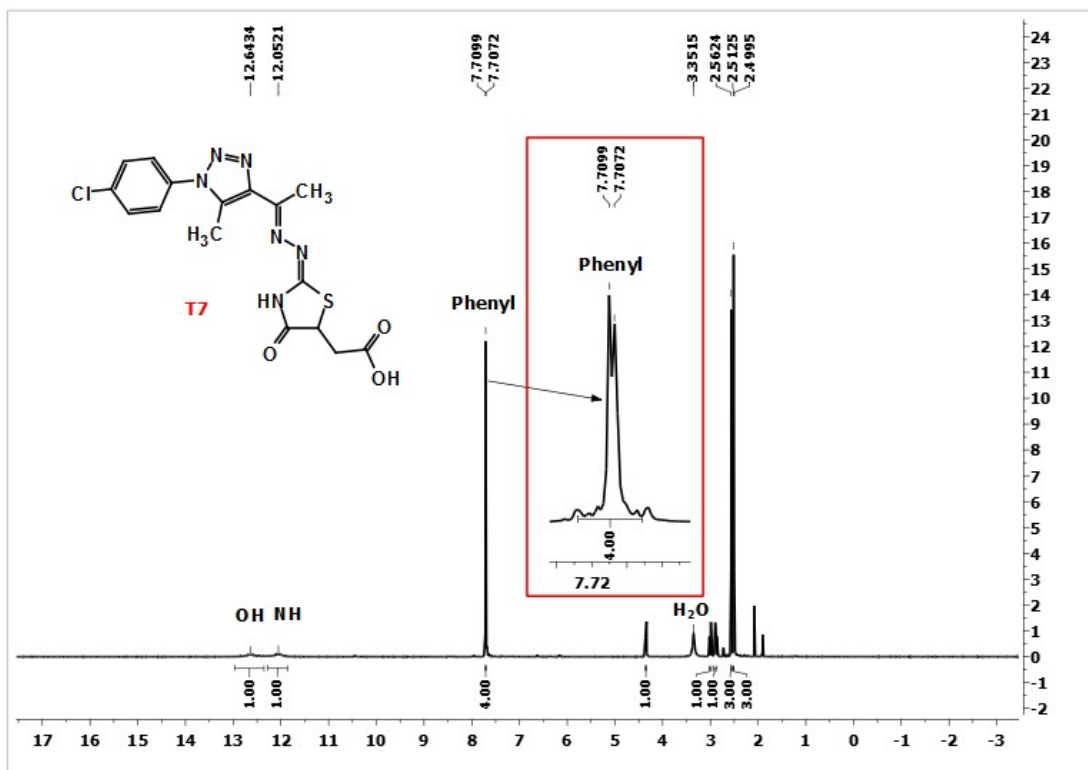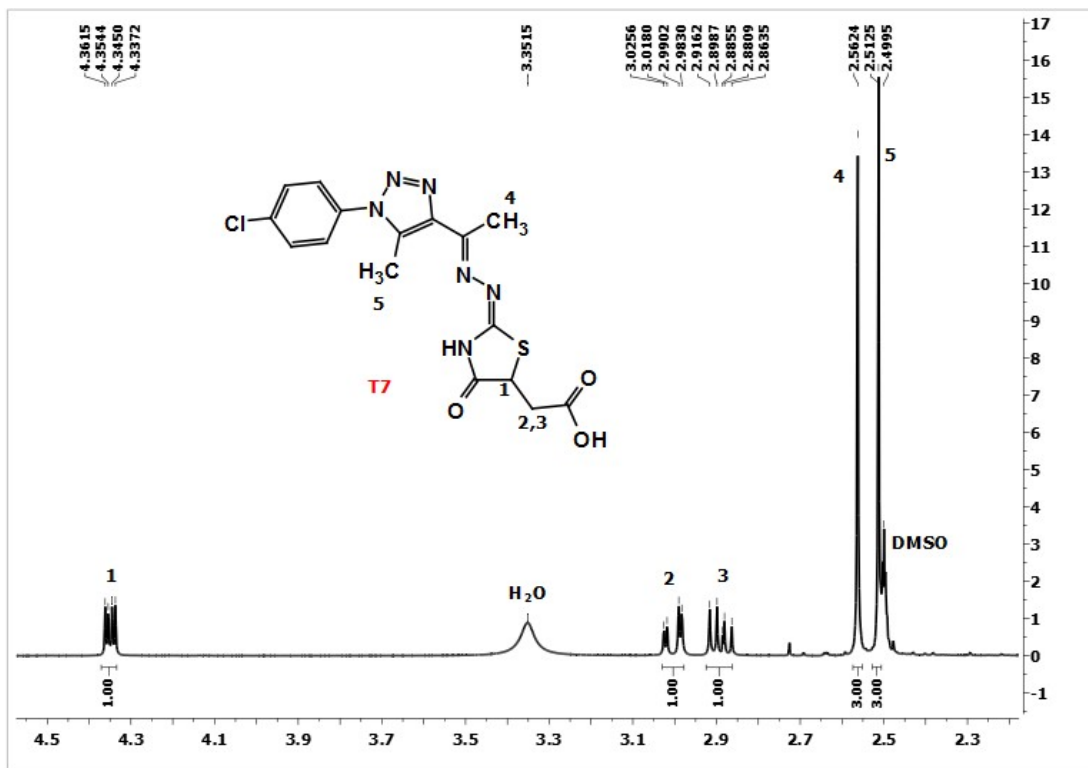

## 1.5 Spectral Data of 21

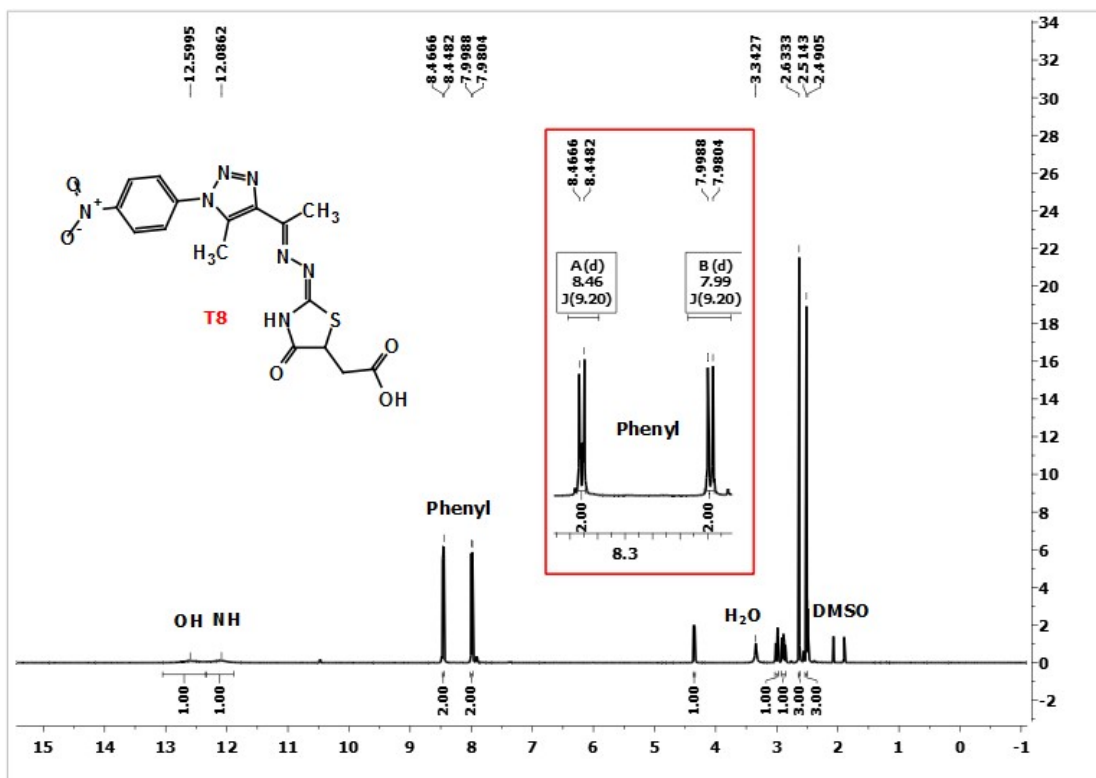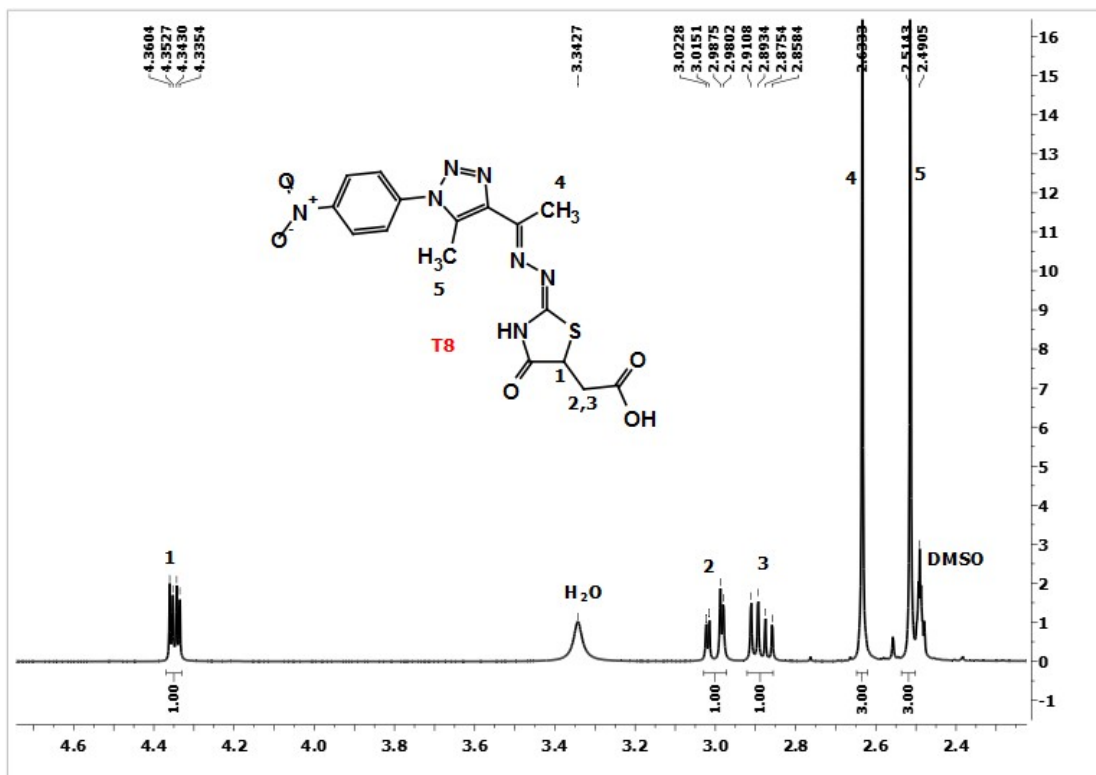

## 1.6 Spectral Data of 22

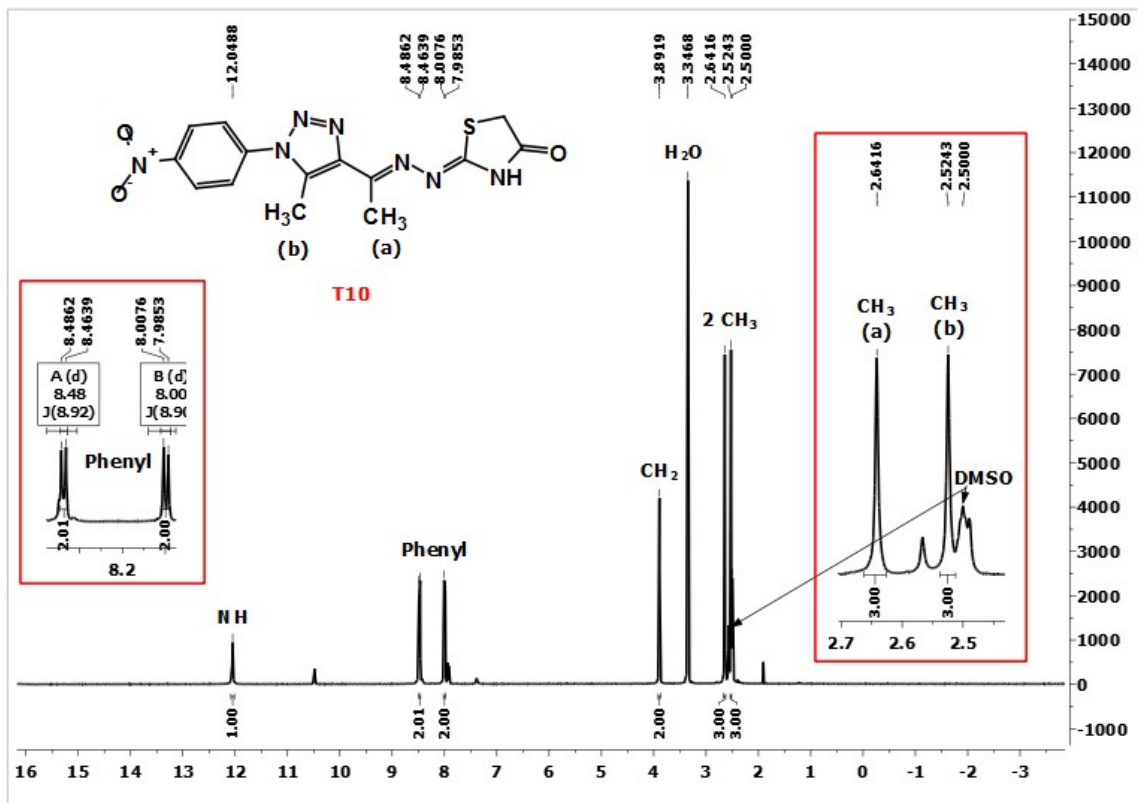

## 2 Docking Study

### 2.1 Sorafenib Re-docked

Score -7.47373486 RMSD 1.41946948

Ligand Interactions Report

3WZE: TRANSFERASE/TRANSFERASE INHIBITOR / 3WZE: TRANSFERASE/TRANSFERASE INHIBITOR

Ligand Receptor Interaction Distance E (kcal/mol)

|     |    |     |     |      |     |            |      |      |
|-----|----|-----|-----|------|-----|------------|------|------|
| N30 | 27 | O   | Cys | 919  | (A) | H-donor    | 2.84 | -3.0 |
| N12 | 40 | OE2 | Glu | 885  | (A) | H-donor    | 2.43 | 13.5 |
| N14 | 42 | OE2 | Glu | 885  | (A) | H-donor    | 2.89 | -4.4 |
| O15 | 44 | N   | Asp | 1046 | (A) | H-acceptor | 2.55 | -0.2 |
| N26 | 46 | N   | Cys | 919  | (A) | H-acceptor | 3.18 | -2.2 |



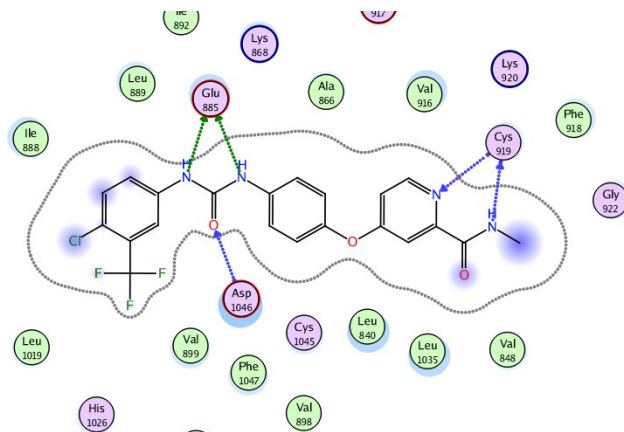

2D interaction of Sorafenib with the binding pocket of VEGFR-2

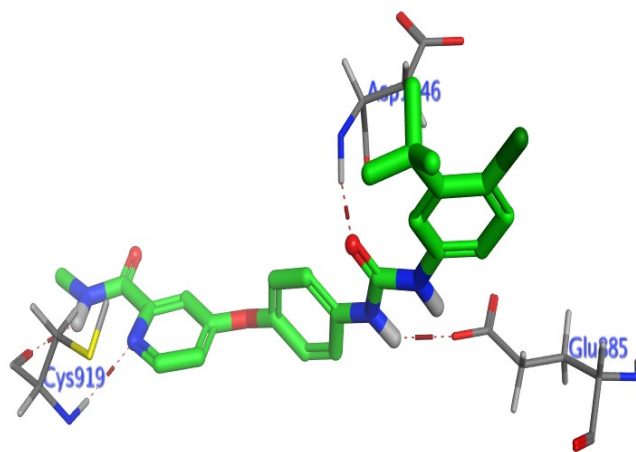

3D interaction pattern of Sorafenib with VEGFR-2

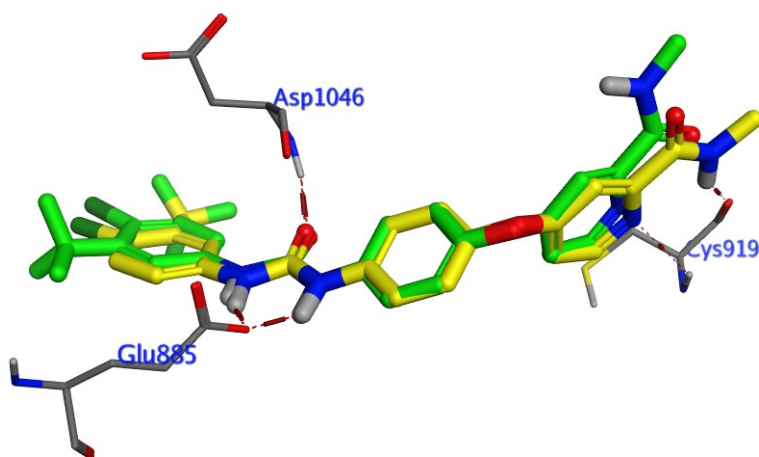

Superimposition of the co-crystallized ligand (green) and sorafenib re-docked (yellow) with RMSD value of 1.41

## 2.2 Results of docking experiment of **14** with VEGFR-2

Score -6.73188953 RMSD 2.00392371

Ligand Interactions Report

3WZE: TRANSFERASE/TRANSFERASE INHIBITOR / 3WZE

Ligand Receptor Interaction Distance E (kcal/mol)

|        |   |     |      |      |      |            |      |      |
|--------|---|-----|------|------|------|------------|------|------|
| N      | 4 | OE2 | Glu  | 885  | (A)  | H-donor    | 2.84 | -4.9 |
| N      | 6 | OE2 | Glu  | 885  | (A)  | H-donor    | 2.89 | -2.5 |
| S      | 7 | CB  | Cys  | 1045 | (A)  | H-acceptor | 4.14 | -0.7 |
| S      | 7 | N   | Asp  | 1046 | (A)  | H-acceptor | 4.10 | -1.9 |
| 5-ring |   | Asp | 1046 | (A)  | pi-H | 4.02       | -0.8 |      |

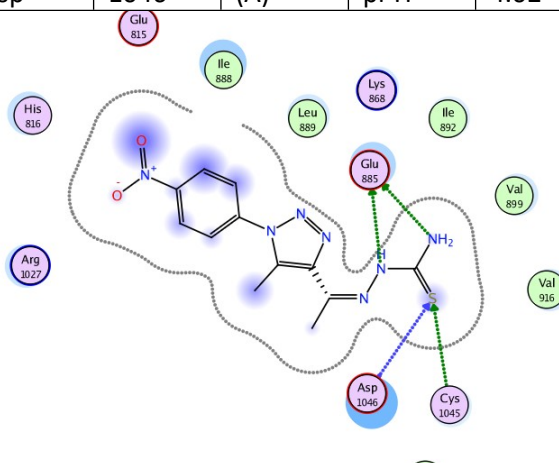

2D interaction of **14** with the binding pocket of VEGFR-2

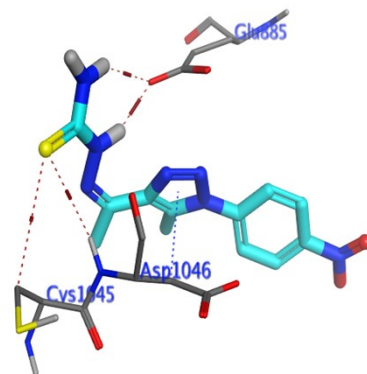

3D interaction of **14** with the binding pocket of VEGFR-2

### 2.3 Results of docking experiment of 15 with VEGFR-2

Score -5.13457108 RMSD 1.7709043

Ligand Interactions Report

3WZE: TRANSFERASE/TRANSFERASE INHIBITOR / 3WZE

Ligand Receptor Interaction Distance E (kcal/mol)

|    |    |     |     |      |     |            |      |      |
|----|----|-----|-----|------|-----|------------|------|------|
| N  | 6  | O   | Ile | 1025 | (A) | H-donor    | 3.18 | -1.3 |
| CL | 19 | O   | Val | 899  | (A) | H-donor    | 3.86 | -0.4 |
| N  | 2  | NH2 | Arg | 1027 | (A) | H-acceptor | 3.08 | -0.9 |

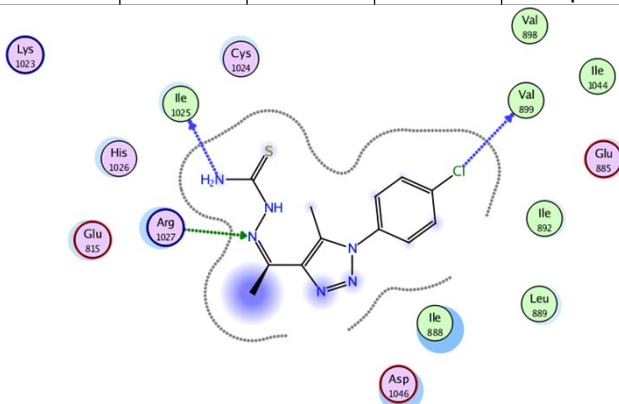

2D interaction of **15** with the binding pocket of VEGFR-2

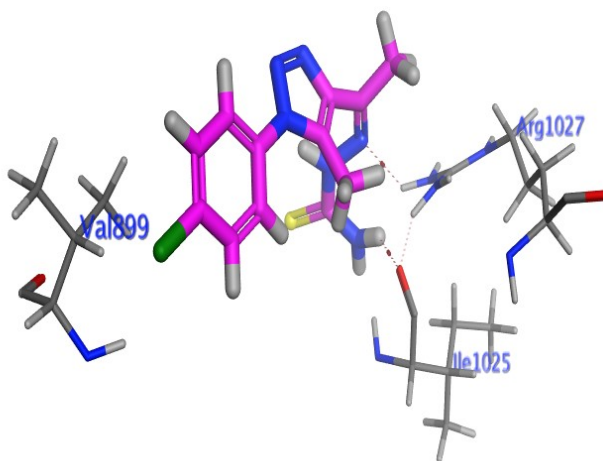

3D interaction of **15** with the binding pocket of VEGFR-2

## 2.4 Results of docking experiment of 16 with VEGFR-2

Score -5.94442511 RMSD 1.91050339

Ligand Interactions Report

3WZE: TRANSFERASE/TRANSFERASE INHIBITOR / 3WZE

Ligand Receptor Interaction Distance E (kcal/mol)

|   |    |    |     |      |     |            |      |      |
|---|----|----|-----|------|-----|------------|------|------|
| N | 7  | N  | Asp | 1046 | (A) | H-acceptor | 2.98 | -1.4 |
| N | 12 | NZ | Lys | 868  | (A) | H-acceptor | 2.98 | -4.7 |

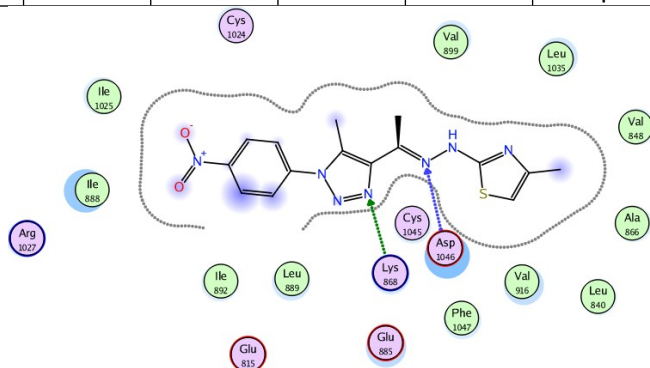

2D interaction of **16** with the binding pocket of VEGFR-2

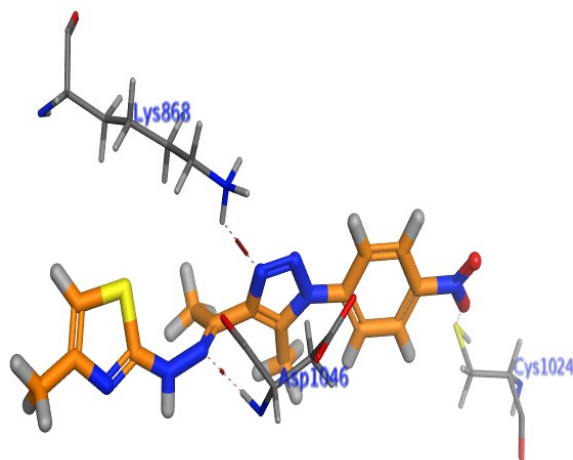

3D interaction of **16** with the binding pocket of VEGFR-2

## 2.5 Results of docking experiment of 17 with VEGFR-2

Score -6.68845892 RMSD 1.39521158

Ligand Interactions Report

3WZE: TRANSFERASE/TRANSFERASE INHIBITOR / 3WZE

Ligand Receptor Interaction Distance E (kcal/mol)

|   |    |    |     |      |     |            |      |      |
|---|----|----|-----|------|-----|------------|------|------|
| N | 7  | N  | Asp | 1046 | (A) | H-acceptor | 3.41 | -2.4 |
| N | 12 | CA | Cys | 1045 | (A) | H-acceptor | 3.09 | -0.9 |

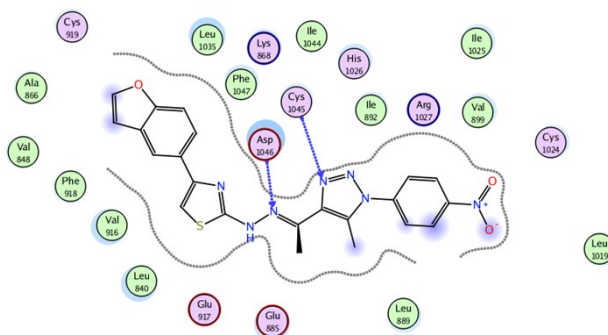

2D interaction of **17** with the binding pocket of VEGFR-2

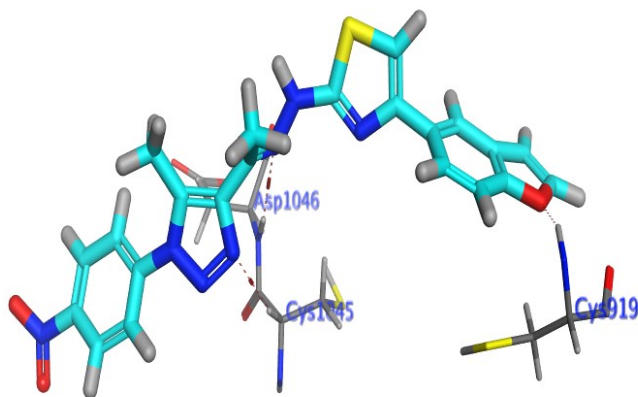

3D interaction of **17** with the binding pocket of VEGFR-2

## 2.6 Results of docking experiment of 20 with VEGFR-2

Score -6.85575104 RMSD 2.08517456

Ligand Interactions Report

3WZE: TRANSFERASE/TRANSFERASE INHIBITOR / 3WZE

Ligand Receptor Interaction Distance E (kcal/mol)

|        |     |     |     |      |      |         |      |      |
|--------|-----|-----|-----|------|------|---------|------|------|
| S      | 2   | O   | ASP | 1046 | (A)  | H-donor | 3.53 | -0.3 |
| N      | 8   | OE2 | Glu | 885  | (A)  | H-donor | 3.05 | -1.5 |
| 5-ring | CD2 | Leu | 889 | (A)  | pi-H | 4.14    | -0.8 |      |

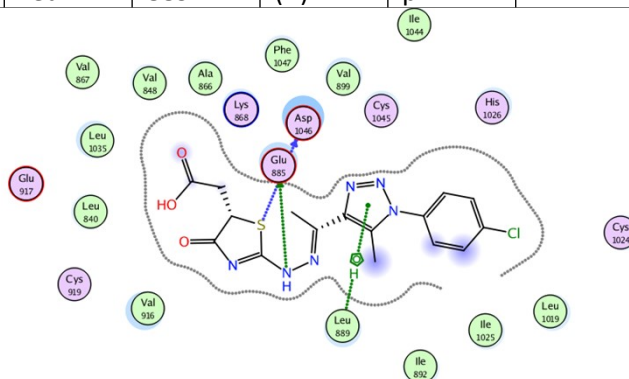

2D interaction of **20** with the binding pocket of VEGFR-2

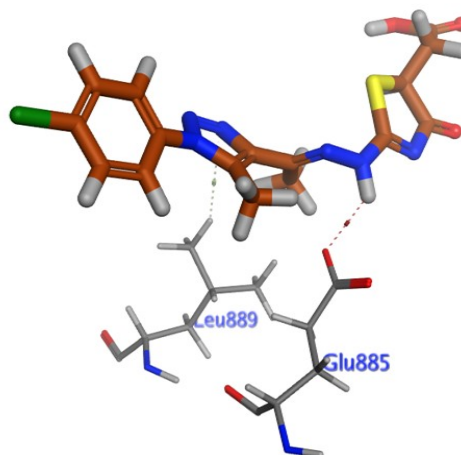

3D interaction of **20** with the binding pocket of VEGFR-2

## 2.7 Results of docking experiment of 21 with VEGFR-2

Score -7.00780106 RMSD 1.88689959

Ligand Interactions Report

3WZE: TRANSFERASE/TRANSFERASE INHIBITOR / 3WZE

Ligand Receptor Interaction Distance E (kcal/mol)

|        |     |     |     |      |      |            |      |      |
|--------|-----|-----|-----|------|------|------------|------|------|
| S      | 2   | OE2 | Cys | 1024 | (A)  | H-donor    | 3.77 | -1.0 |
| N      | 8   | OE2 | Lys | 868  | (A)  | H-donor    | 2.94 | -6.3 |
| N      | 9   | N   | Asp | 1046 | (A)  | H-acceptor | 3.26 | -2.4 |
| 6-ring | CD2 | Ile | 888 | (A)  | pi-H | 4.00       | -0.8 |      |

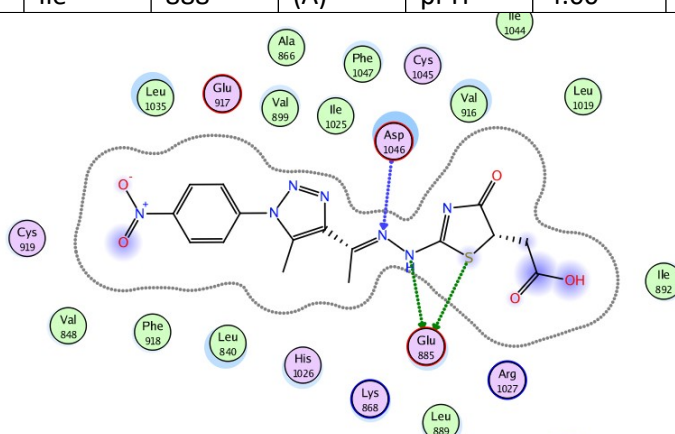

2D interaction of **21** with the binding pocket of VEGFR-2

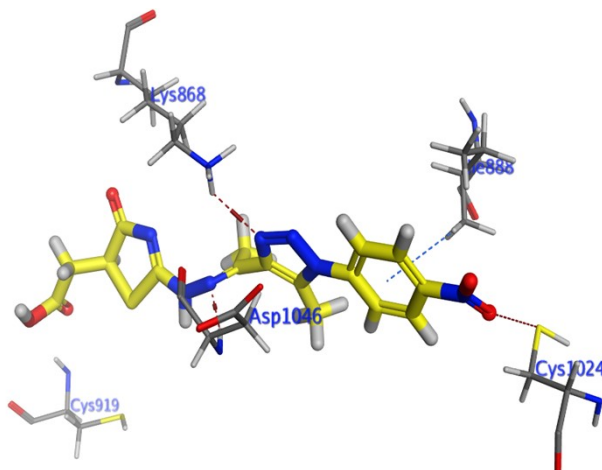

2D interaction of **21** with the binding pocket of VEGFR-2

## 2.8 Results of docking experiment of 22 with VEGFR-2

Score -6.31921005 RMSD 1.88676536

Ligand Interactions Report

3WZE: TRANSFERASE/TRANSFERASE INHIBITOR / 3WZE

Ligand Receptor Interaction Distance E (kcal/mol)

|   |    |    |     |      |     |         |      |      |
|---|----|----|-----|------|-----|---------|------|------|
| S | 1  | O  | Asp | 1046 | (A) | H-donor | 3.48 | -0.1 |
| O | 23 | SD | Met | 1016 | (A) | H-donor | 3.68 | -1.1 |

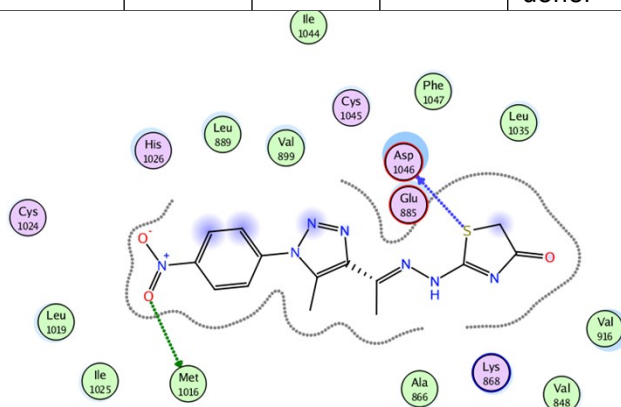

2D interaction of **22** with the binding pocket of VEGFR-2

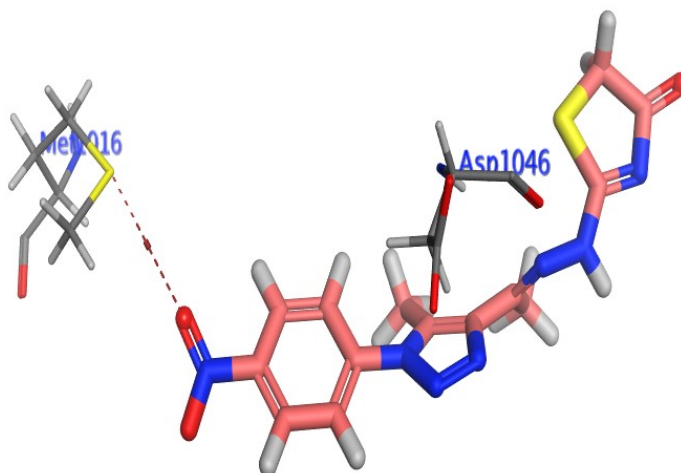

2D interaction of **22** with the binding pocket of VEGFR-2



### 3 ADMET Profiling Study

#### 3.1 ADMET Profile of 14

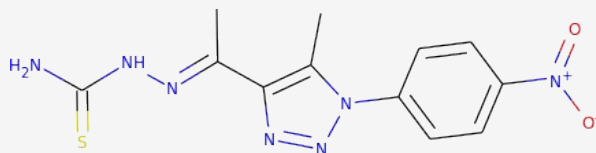

Molecule properties:

| Descriptor       | Value   |
|------------------|---------|
| Molecular Weight | 319.35  |
| LogP             | 1.04112 |
| #Rotatable Bonds | 4       |
| #Acceptors       | 7       |
| #Donors          | 2       |
| Surface Area     | 130.511 |

| Property            | Model Name                    | Predicted Value | Unit                                        |
|---------------------|-------------------------------|-----------------|---------------------------------------------|
| <b>Absorption</b>   | Water solubility              | <b>-2.982</b>   | Numeric (log mol/L)                         |
| <b>Absorption</b>   | Caco2 permeability            | <b>-0.061</b>   | Numeric (log Papp in 10 <sup>-6</sup> cm/s) |
| <b>Absorption</b>   | Intestinal absorption (human) | <b>74.97</b>    | Numeric (% Absorbed)                        |
| <b>Absorption</b>   | Skin Permeability             | <b>-2.763</b>   | Numeric (log Kp)                            |
| <b>Absorption</b>   | P-glycoprotein substrate      | <b>Yes</b>      | Categorical (Yes/No)                        |
| <b>Absorption</b>   | P-glycoprotein I inhibitor    | <b>No</b>       | Categorical (Yes/No)                        |
| <b>Absorption</b>   | P-glycoprotein II inhibitor   | <b>No</b>       | Categorical (Yes/No)                        |
| <b>Distribution</b> | VDss (human)                  | <b>-0.212</b>   | Numeric (log L/kg)                          |
| <b>Distribution</b> | Fraction unbound (human)      | <b>0.161</b>    | Numeric (Fu)                                |

| Descriptor          | Value                             |               |                            |
|---------------------|-----------------------------------|---------------|----------------------------|
| <b>Distribution</b> | BBB permeability                  | <b>-1.117</b> | Numeric (log BB)           |
| <b>Distribution</b> | CNS permeability                  | <b>-2.917</b> | Numeric (log PS)           |
| <b>Metabolism</b>   | CYP2D6 substrate                  | <b>No</b>     | Categorical (Yes/No)       |
| <b>Metabolism</b>   | CYP3A4 substrate                  | <b>No</b>     | Categorical (Yes/No)       |
| <b>Metabolism</b>   | CYP1A2 inhibitor                  | <b>No</b>     | Categorical (Yes/No)       |
| <b>Metabolism</b>   | CYP2C19 inhibitor                 | <b>No</b>     | Categorical (Yes/No)       |
| <b>Metabolism</b>   | CYP2C9 inhibitor                  | <b>No</b>     | Categorical (Yes/No)       |
| <b>Metabolism</b>   | CYP2D6 inhibitor                  | <b>No</b>     | Categorical (Yes/No)       |
| <b>Metabolism</b>   | CYP3A4 inhibitor                  | <b>No</b>     | Categorical (Yes/No)       |
| <b>Excretion</b>    | Total Clearance                   | <b>-0.017</b> | Numeric (log ml/min/kg)    |
| <b>Excretion</b>    | Renal OCT2 substrate              | <b>No</b>     | Categorical (Yes/No)       |
| <b>Toxicity</b>     | AMES toxicity                     | <b>Yes</b>    | Categorical (Yes/No)       |
| <b>Toxicity</b>     | Max. tolerated dose (human)       | <b>0.531</b>  | Numeric (log mg/kg/day)    |
| <b>Toxicity</b>     | hERG I inhibitor                  | <b>No</b>     | Categorical (Yes/No)       |
| <b>Toxicity</b>     | hERG II inhibitor                 | <b>No</b>     | Categorical (Yes/No)       |
| <b>Toxicity</b>     | Oral Rat Acute Toxicity (LD50)    | <b>2.256</b>  | Numeric (mol/kg)           |
| <b>Toxicity</b>     | Oral Rat Chronic Toxicity (LOAEL) | <b>2.522</b>  | Numeric (log mg/kg_bw/day) |
| <b>Toxicity</b>     | Hepatotoxicity                    | <b>No</b>     | Categorical (Yes/No)       |
| <b>Toxicity</b>     | Skin Sensitisation                | <b>No</b>     | Categorical (Yes/No)       |
| <b>Toxicity</b>     | <i>T.Pyriformis</i> toxicity      | <b>0.48</b>   | Numeric (log ug/L)         |
| <b>Toxicity</b>     | Minnow toxicity                   | <b>0.209</b>  | Numeric (log mM)           |

### 3.2 ADMET Profile of 15

#### Molecule Depiction

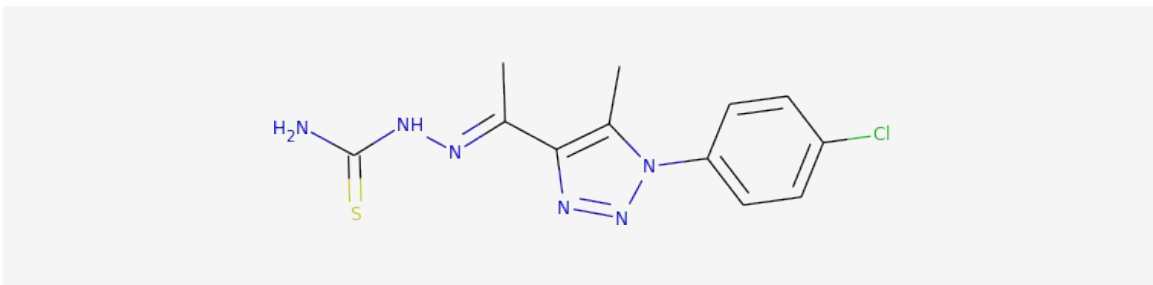

#### Molecule properties:

| Descriptor       | Value   |
|------------------|---------|
| Molecular Weight | 308.798 |
| LogP             | 1.78632 |
| #Rotatable Bonds | 3       |
| #Acceptors       | 5       |
| #Donors          | 2       |
| Surface Area     | 126.161 |

| Property          | Model Name                    | Predicted Value | Unit                                        |
|-------------------|-------------------------------|-----------------|---------------------------------------------|
| <b>Absorption</b> | Water solubility              | <b>-3.27</b>    | Numeric (log mol/L)                         |
| <b>Absorption</b> | Caco2 permeability            | <b>1.315</b>    | Numeric (log Papp in 10 <sup>-6</sup> cm/s) |
| <b>Absorption</b> | Intestinal absorption (human) | <b>92.584</b>   | Numeric (% Absorbed)                        |
| <b>Absorption</b> | Skin Permeability             | <b>-2.857</b>   | Numeric (log Kp)                            |
| <b>Absorption</b> | P-glycoprotein                | <b>No</b>       | Categorical (Yes/No)                        |

| Descriptor          | Value                       |        |                         |
|---------------------|-----------------------------|--------|-------------------------|
|                     | substrate                   |        |                         |
| <b>Absorption</b>   | P-glycoprotein I inhibitor  | No     | Categorical (Yes/No)    |
| <b>Absorption</b>   | P-glycoprotein II inhibitor | No     | Categorical (Yes/No)    |
| <b>Distribution</b> | VDss (human)                | -0.105 | Numeric (log L/kg)      |
| <b>Distribution</b> | Fraction unbound (human)    | 0.282  | Numeric (Fu)            |
| <b>Distribution</b> | BBB permeability            | -0.78  | Numeric (log BB)        |
| <b>Distribution</b> | CNS permeability            | -3.379 | Numeric (log PS)        |
| <b>Metabolism</b>   | CYP2D6 substrate            | No     | Categorical (Yes/No)    |
| <b>Metabolism</b>   | CYP3A4 substrate            | No     | Categorical (Yes/No)    |
| <b>Metabolism</b>   | CYP1A2 inhibitor            | Yes    | Categorical (Yes/No)    |
| <b>Metabolism</b>   | CYP2C19 inhibitor           | No     | Categorical (Yes/No)    |
| <b>Metabolism</b>   | CYP2C9 inhibitor            | No     | Categorical (Yes/No)    |
| <b>Metabolism</b>   | CYP2D6 inhibitor            | No     | Categorical (Yes/No)    |
| <b>Metabolism</b>   | CYP3A4 inhibitor            | No     | Categorical (Yes/No)    |
| <b>Excretion</b>    | Total Clearance             | -0.165 | Numeric (log ml/min/kg) |
| <b>Excretion</b>    | Renal OCT2 substrate        | No     | Categorical (Yes/No)    |
| <b>Toxicity</b>     | AMES toxicity               | No     | Categorical (Yes/No)    |

| Descriptor      | Value                             |              |                            |
|-----------------|-----------------------------------|--------------|----------------------------|
| <b>Toxicity</b> | Max. tolerated dose (human)       | <b>0.686</b> | Numeric (log mg/kg/day)    |
| <b>Toxicity</b> | hERG I inhibitor                  | <b>No</b>    | Categorical (Yes/No)       |
| <b>Toxicity</b> | hERG II inhibitor                 | <b>No</b>    | Categorical (Yes/No)       |
| <b>Toxicity</b> | Oral Rat Acute Toxicity (LD50)    | <b>2.345</b> | Numeric (mol/kg)           |
| <b>Toxicity</b> | Oral Rat Chronic Toxicity (LOAEL) | <b>1.894</b> | Numeric (log mg/kg_bw/day) |
| <b>Toxicity</b> | Hepatotoxicity                    | <b>No</b>    | Categorical (Yes/No)       |
| <b>Toxicity</b> | Skin Sensitisation                | <b>No</b>    | Categorical (Yes/No)       |
| <b>Toxicity</b> | <i>T.Pyriformis</i> toxicity      | <b>0.586</b> | Numeric (log ug/L)         |
| <b>Toxicity</b> | Minnow toxicity                   | <b>0.905</b> | Numeric (log mM)           |

### 3.3 ADMET Profile of 16

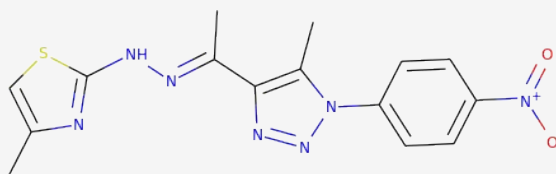

Molecule properties:

| Descriptor       | Value   |
|------------------|---------|
| Molecular Weight | 357.399 |
| LogP             | 3.08494 |
| #Rotatable Bonds | 5       |
| #Acceptors       | 9       |
| #Donors          | 1       |
| Surface Area     | 146.729 |

| Property          | Model Name                    | Predicted Value | Unit                                        |
|-------------------|-------------------------------|-----------------|---------------------------------------------|
| <b>Absorption</b> | Water solubility              | <b>-4.39</b>    | Numeric (log mol/L)                         |
| <b>Absorption</b> | Caco2 permeability            | <b>0.023</b>    | Numeric (log Papp in 10 <sup>-6</sup> cm/s) |
| <b>Absorption</b> | Intestinal absorption (human) | <b>93.226</b>   | Numeric (% Absorbed)                        |
| <b>Absorption</b> | Skin Permeability             | <b>-2.763</b>   | Numeric (log Kp)                            |
| <b>Absorption</b> | P-glycoprotein substrate      | <b>Yes</b>      | Categorical (Yes/No)                        |

| Descriptor          | Value                       |               |                         |
|---------------------|-----------------------------|---------------|-------------------------|
| <b>Absorption</b>   | P-glycoprotein I inhibitor  | <b>Yes</b>    | Categorical (Yes/No)    |
| <b>Absorption</b>   | P-glycoprotein II inhibitor | <b>No</b>     | Categorical (Yes/No)    |
| <b>Distribution</b> | VDss (human)                | <b>-0.206</b> | Numeric (log L/kg)      |
| <b>Distribution</b> | Fraction unbound (human)    | <b>0.187</b>  | Numeric (Fu)            |
| <b>Distribution</b> | BBB permeability            | <b>-1.307</b> | Numeric (log BB)        |
| <b>Distribution</b> | CNS permeability            | <b>-2.501</b> | Numeric (log PS)        |
| <b>Metabolism</b>   | CYP2D6 substrate            | <b>No</b>     | Categorical (Yes/No)    |
| <b>Metabolism</b>   | CYP3A4 substrate            | <b>Yes</b>    | Categorical (Yes/No)    |
| <b>Metabolism</b>   | CYP1A2 inhibitor            | <b>Yes</b>    | Categorical (Yes/No)    |
| <b>Metabolism</b>   | CYP2C19 inhibitor           | <b>Yes</b>    | Categorical (Yes/No)    |
| <b>Metabolism</b>   | CYP2C9 inhibitor            | <b>Yes</b>    | Categorical (Yes/No)    |
| <b>Metabolism</b>   | CYP2D6 inhibitor            | <b>No</b>     | Categorical (Yes/No)    |
| <b>Metabolism</b>   | CYP3A4 inhibitor            | <b>No</b>     | Categorical (Yes/No)    |
| <b>Excretion</b>    | Total Clearance             | <b>0.302</b>  | Numeric (log ml/min/kg) |
| <b>Excretion</b>    | Renal OCT2 substrate        | <b>No</b>     | Categorical (Yes/No)    |
| <b>Toxicity</b>     | AMES toxicity               | <b>Yes</b>    | Categorical (Yes/No)    |
| <b>Toxicity</b>     | Max. tolerated dose         | <b>-0.279</b> | Numeric (log mg/kg/day) |

| Descriptor      | Value                             |              |                            |
|-----------------|-----------------------------------|--------------|----------------------------|
|                 | (human)                           |              |                            |
| <b>Toxicity</b> | hERG I inhibitor                  | <b>No</b>    | Categorical (Yes/No)       |
| <b>Toxicity</b> | hERG II inhibitor                 | <b>No</b>    | Categorical (Yes/No)       |
| <b>Toxicity</b> | Oral Rat Acute Toxicity (LD50)    | <b>2.961</b> | Numeric (mol/kg)           |
| <b>Toxicity</b> | Oral Rat Chronic Toxicity (LOAEL) | <b>1.127</b> | Numeric (log mg/kg_bw/day) |
| <b>Toxicity</b> | Hepatotoxicity                    | <b>Yes</b>   | Categorical (Yes/No)       |
| <b>Toxicity</b> | Skin Sensitisation                | <b>No</b>    | Categorical (Yes/No)       |
| <b>Toxicity</b> | <i>T.Pyriformis</i> toxicity      | <b>0.61</b>  | Numeric (log ug/L)         |
| <b>Toxicity</b> | Minnow toxicity                   | <b>0.922</b> | Numeric (log mM)           |



### 3.4 ADMET Profile of 17

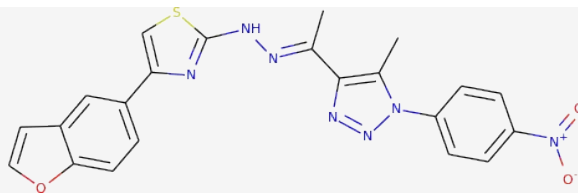

Molecule properties:

| Descriptor       | Value   |
|------------------|---------|
| Molecular Weight | 459.491 |
| LogP             | 5.18972 |
| #Rotatable Bonds | 6       |
| #Acceptors       | 10      |
| #Donors          | 1       |
| Surface Area     | 190.897 |

| Property          | Model Name                    | Predicted Value | Unit                                        |
|-------------------|-------------------------------|-----------------|---------------------------------------------|
| <b>Absorption</b> | Water solubility              | <b>-4.785</b>   | Numeric (log mol/L)                         |
| <b>Absorption</b> | Caco2 permeability            | <b>-0.142</b>   | Numeric (log Papp in 10 <sup>-6</sup> cm/s) |
| <b>Absorption</b> | Intestinal absorption (human) | <b>100</b>      | Numeric (% Absorbed)                        |
| <b>Absorption</b> | Skin Permeability             | <b>-2.732</b>   | Numeric (log Kp)                            |
| <b>Absorption</b> | P-glycoprotein substrate      | <b>Yes</b>      | Categorical (Yes/No)                        |
| <b>Absorption</b> | P-glycoprotein I              | <b>Yes</b>      | Categorical (Yes/No)                        |

| Descriptor          | Value                       |               |                         |
|---------------------|-----------------------------|---------------|-------------------------|
|                     | inhibitor                   |               |                         |
| <b>Absorption</b>   | P-glycoprotein II inhibitor | <b>Yes</b>    | Categorical (Yes/No)    |
| <b>Distribution</b> | VDss (human)                | <b>0.268</b>  | Numeric (log L/kg)      |
| <b>Distribution</b> | Fraction unbound (human)    | <b>0.175</b>  | Numeric (Fu)            |
| <b>Distribution</b> | BBB permeability            | <b>-1.478</b> | Numeric (log BB)        |
| <b>Distribution</b> | CNS permeability            | <b>-2.065</b> | Numeric (log PS)        |
| <b>Metabolism</b>   | CYP2D6 substrate            | <b>No</b>     | Categorical (Yes/No)    |
| <b>Metabolism</b>   | CYP3A4 substrate            | <b>Yes</b>    | Categorical (Yes/No)    |
| <b>Metabolism</b>   | CYP1A2 inhibitor            | <b>No</b>     | Categorical (Yes/No)    |
| <b>Metabolism</b>   | CYP2C19 inhibitor           | <b>Yes</b>    | Categorical (Yes/No)    |
| <b>Metabolism</b>   | CYP2C9 inhibitor            | <b>Yes</b>    | Categorical (Yes/No)    |
| <b>Metabolism</b>   | CYP2D6 inhibitor            | <b>No</b>     | Categorical (Yes/No)    |
| <b>Metabolism</b>   | CYP3A4 inhibitor            | <b>Yes</b>    | Categorical (Yes/No)    |
| <b>Excretion</b>    | Total Clearance             | <b>0.323</b>  | Numeric (log ml/min/kg) |
| <b>Excretion</b>    | Renal OCT2 substrate        | <b>No</b>     | Categorical (Yes/No)    |
| <b>Toxicity</b>     | AMES toxicity               | <b>Yes</b>    | Categorical (Yes/No)    |
| <b>Toxicity</b>     | Max. tolerated dose (human) | <b>0.288</b>  | Numeric (log mg/kg/day) |

| Descriptor      | Value                             |               |                            |
|-----------------|-----------------------------------|---------------|----------------------------|
| <b>Toxicity</b> | hERG I inhibitor                  | <b>No</b>     | Categorical (Yes/No)       |
| <b>Toxicity</b> | hERG II inhibitor                 | <b>No</b>     | Categorical (Yes/No)       |
| <b>Toxicity</b> | Oral Rat Acute Toxicity (LD50)    | <b>3.204</b>  | Numeric (mol/kg)           |
| <b>Toxicity</b> | Oral Rat Chronic Toxicity (LOAEL) | <b>0.419</b>  | Numeric (log mg/kg_bw/day) |
| <b>Toxicity</b> | Hepatotoxicity                    | <b>Yes</b>    | Categorical (Yes/No)       |
| <b>Toxicity</b> | Skin Sensitisation                | <b>No</b>     | Categorical (Yes/No)       |
| <b>Toxicity</b> | <i>T.Pyriiformis</i> toxicity     | <b>0.286</b>  | Numeric (log ug/L)         |
| <b>Toxicity</b> | Minnow toxicity                   | <b>-1.502</b> | Numeric (log mM)           |

### 3.5 ADMET Profile of 20

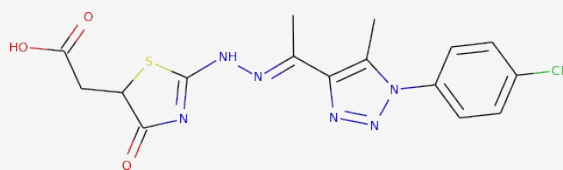

Molecule properties:

| Descriptor       | Value   |
|------------------|---------|
| Molecular Weight | 406.855 |
| LogP             | 2.01542 |
| #Rotatable Bonds | 5       |
| #Acceptors       | 8       |
| #Donors          | 2       |
| Surface Area     | 163.052 |

| Property          | Model Name                    | Predicted Value | Unit                                        |
|-------------------|-------------------------------|-----------------|---------------------------------------------|
| <b>Absorption</b> | Water solubility              | <b>-3.338</b>   | Numeric (log mol/L)                         |
| <b>Absorption</b> | Caco2 permeability            | <b>0.67</b>     | Numeric (log Papp in 10 <sup>-6</sup> cm/s) |
| <b>Absorption</b> | Intestinal absorption (human) | <b>58.477</b>   | Numeric (% Absorbed)                        |
| <b>Absorption</b> | Skin Permeability             | <b>-2.735</b>   | Numeric (log Kp)                            |
| <b>Absorption</b> | P-glycoprotein substrate      | <b>Yes</b>      | Categorical (Yes/No)                        |

| Descriptor          | Value                       |               |                         |
|---------------------|-----------------------------|---------------|-------------------------|
| <b>Absorption</b>   | P-glycoprotein I inhibitor  | <b>No</b>     | Categorical (Yes/No)    |
| <b>Absorption</b>   | P-glycoprotein II inhibitor | <b>No</b>     | Categorical (Yes/No)    |
| <b>Distribution</b> | VDss (human)                | <b>-1.89</b>  | Numeric (log L/kg)      |
| <b>Distribution</b> | Fraction unbound (human)    | <b>0.318</b>  | Numeric (Fu)            |
| <b>Distribution</b> | BBB permeability            | <b>-1.476</b> | Numeric (log BB)        |
| <b>Distribution</b> | CNS permeability            | <b>-2.76</b>  | Numeric (log PS)        |
| <b>Metabolism</b>   | CYP2D6 substrate            | <b>Yes</b>    | Categorical (Yes/No)    |
| <b>Metabolism</b>   | CYP3A4 substrate            | <b>Yes</b>    | Categorical (Yes/No)    |
| <b>Metabolism</b>   | CYP1A2 inhibitor            | <b>No</b>     | Categorical (Yes/No)    |
| <b>Metabolism</b>   | CYP2C19 inhibitor           | <b>No</b>     | Categorical (Yes/No)    |
| <b>Metabolism</b>   | CYP2C9 inhibitor            | <b>No</b>     | Categorical (Yes/No)    |
| <b>Metabolism</b>   | CYP2D6 inhibitor            | <b>No</b>     | Categorical (Yes/No)    |
| <b>Metabolism</b>   | CYP3A4 inhibitor            | <b>No</b>     | Categorical (Yes/No)    |
| <b>Excretion</b>    | Total Clearance             | <b>0.119</b>  | Numeric (log ml/min/kg) |
| <b>Excretion</b>    | Renal OCT2 substrate        | <b>No</b>     | Categorical (Yes/No)    |
| <b>Toxicity</b>     | AMES toxicity               | <b>No</b>     | Categorical (Yes/No)    |
| <b>Toxicity</b>     | Max. tolerated dose         | <b>0.322</b>  | Numeric (log mg/kg/day) |

| Descriptor      | Value                             |              |                            |
|-----------------|-----------------------------------|--------------|----------------------------|
|                 | (human)                           |              |                            |
| <b>Toxicity</b> | hERG I inhibitor                  | <b>No</b>    | Categorical (Yes/No)       |
| <b>Toxicity</b> | hERG II inhibitor                 | <b>No</b>    | Categorical (Yes/No)       |
| <b>Toxicity</b> | Oral Rat Acute Toxicity (LD50)    | <b>2.174</b> | Numeric (mol/kg)           |
| <b>Toxicity</b> | Oral Rat Chronic Toxicity (LOAEL) | <b>1.827</b> | Numeric (log mg/kg_bw/day) |
| <b>Toxicity</b> | Hepatotoxicity                    | <b>Yes</b>   | Categorical (Yes/No)       |
| <b>Toxicity</b> | Skin Sensitisation                | <b>No</b>    | Categorical (Yes/No)       |
| <b>Toxicity</b> | <i>T.Pyriformis</i> toxicity      | <b>0.285</b> | Numeric (log ug/L)         |
| <b>Toxicity</b> | Minnow toxicity                   | <b>1.521</b> | Numeric (log mM)           |

### 3.6 ADMET Profile of 21

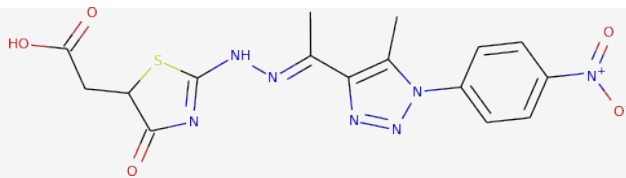

Molecule properties:

| Descriptor       | Value   |
|------------------|---------|
| Molecular Weight | 417.407 |
| LogP             | 1.27022 |
| #Rotatable Bonds | 6       |
| #Acceptors       | 10      |
| #Donors          | 2       |
| Surface Area     | 167.402 |

| Property          | Model Name                    | Predicted Value | Unit                                        |
|-------------------|-------------------------------|-----------------|---------------------------------------------|
| <b>Absorption</b> | Water solubility              | <b>-3.489</b>   | Numeric (log mol/L)                         |
| <b>Absorption</b> | Caco2 permeability            | <b>-0.59</b>    | Numeric (log Papp in 10 <sup>-6</sup> cm/s) |
| <b>Absorption</b> | Intestinal absorption (human) | <b>54.111</b>   | Numeric (% Absorbed)                        |
| <b>Absorption</b> | Skin Permeability             | <b>-2.735</b>   | Numeric (log Kp)                            |
| <b>Absorption</b> | P-glycoprotein substrate      | <b>Yes</b>      | Categorical (Yes/No)                        |
| <b>Absorption</b> | P-glycoprotein I              | <b>No</b>       | Categorical (Yes/No)                        |

| Descriptor          | Value                       |        |                         |
|---------------------|-----------------------------|--------|-------------------------|
|                     | inhibitor                   |        |                         |
| <b>Absorption</b>   | P-glycoprotein II inhibitor | No     | Categorical (Yes/No)    |
| <b>Distribution</b> | VDss (human)                | -1.916 | Numeric (log L/kg)      |
| <b>Distribution</b> | Fraction unbound (human)    | 0.253  | Numeric (Fu)            |
| <b>Distribution</b> | BBB permeability            | -1.803 | Numeric (log BB)        |
| <b>Distribution</b> | CNS permeability            | -3.099 | Numeric (log PS)        |
| <b>Metabolism</b>   | CYP2D6 substrate            | Yes    | Categorical (Yes/No)    |
| <b>Metabolism</b>   | CYP3A4 substrate            | Yes    | Categorical (Yes/No)    |
| <b>Metabolism</b>   | CYP1A2 inhibitor            | No     | Categorical (Yes/No)    |
| <b>Metabolism</b>   | CYP2C19 inhibitor           | No     | Categorical (Yes/No)    |
| <b>Metabolism</b>   | CYP2C9 inhibitor            | No     | Categorical (Yes/No)    |
| <b>Metabolism</b>   | CYP2D6 inhibitor            | No     | Categorical (Yes/No)    |
| <b>Metabolism</b>   | CYP3A4 inhibitor            | No     | Categorical (Yes/No)    |
| <b>Excretion</b>    | Total Clearance             | 0.269  | Numeric (log ml/min/kg) |
| <b>Excretion</b>    | Renal OCT2 substrate        | No     | Categorical (Yes/No)    |
| <b>Toxicity</b>     | AMES toxicity               | No     | Categorical (Yes/No)    |
| <b>Toxicity</b>     | Max. tolerated dose (human) | -0.177 | Numeric (log mg/kg/day) |



| Descriptor      | Value                             |              |                            |
|-----------------|-----------------------------------|--------------|----------------------------|
| <b>Toxicity</b> | hERG I inhibitor                  | <b>No</b>    | Categorical (Yes/No)       |
| <b>Toxicity</b> | hERG II inhibitor                 | <b>No</b>    | Categorical (Yes/No)       |
| <b>Toxicity</b> | Oral Rat Acute Toxicity (LD50)    | <b>1.981</b> | Numeric (mol/kg)           |
| <b>Toxicity</b> | Oral Rat Chronic Toxicity (LOAEL) | <b>2.463</b> | Numeric (log mg/kg_bw/day) |
| <b>Toxicity</b> | Hepatotoxicity                    | <b>Yes</b>   | Categorical (Yes/No)       |
| <b>Toxicity</b> | Skin Sensitisation                | <b>No</b>    | Categorical (Yes/No)       |
| <b>Toxicity</b> | <i>T.Pyriiformis</i> toxicity     | <b>0.285</b> | Numeric (log ug/L)         |
| <b>Toxicity</b> | Minnow toxicity                   | <b>1.913</b> | Numeric (log mM)           |

### 3.7 ADMET Profile of 22

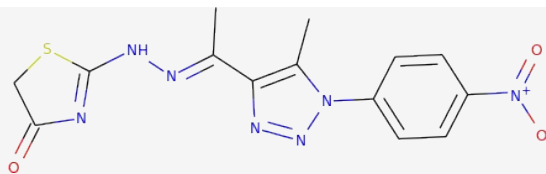

Molecule properties:

| Descriptor       | Value   |
|------------------|---------|
| Molecular Weight | 359.371 |
| LogP             | 1.42692 |
| #Rotatable Bonds | 4       |
| #Acceptors       | 9       |
| #Donors          | 1       |
| Surface Area     | 145.716 |

| Property          | Model Name                    | Predicted Value | Unit                                        |
|-------------------|-------------------------------|-----------------|---------------------------------------------|
| <b>Absorption</b> | Water solubility              | <b>-3.895</b>   | Numeric (log mol/L)                         |
| <b>Absorption</b> | Caco2 permeability            | <b>-0.061</b>   | Numeric (log Papp in 10 <sup>-6</sup> cm/s) |
| <b>Absorption</b> | Intestinal absorption (human) | <b>82.65</b>    | Numeric (% Absorbed)                        |
| <b>Absorption</b> | Skin Permeability             | <b>-2.759</b>   | Numeric (log Kp)                            |
| <b>Absorption</b> | P-glycoprotein substrate      | <b>Yes</b>      | Categorical (Yes/No)                        |
| <b>Absorption</b> | P-glycoprotein I inhibitor    | <b>Yes</b>      | Categorical (Yes/No)                        |

| <b>Descriptor</b>   | <b>Value</b>                |               |                         |
|---------------------|-----------------------------|---------------|-------------------------|
| <b>Absorption</b>   | P-glycoprotein II inhibitor | <b>No</b>     | Categorical (Yes/No)    |
| <b>Distribution</b> | VDss (human)                | <b>-0.439</b> | Numeric (log L/kg)      |
| <b>Distribution</b> | Fraction unbound (human)    | <b>0.24</b>   | Numeric (Fu)            |
| <b>Distribution</b> | BBB permeability            | <b>-1.357</b> | Numeric (log BB)        |
| <b>Distribution</b> | CNS permeability            | <b>-2.746</b> | Numeric (log PS)        |
| <b>Metabolism</b>   | CYP2D6 substrate            | <b>No</b>     | Categorical (Yes/No)    |
| <b>Metabolism</b>   | CYP3A4 substrate            | <b>Yes</b>    | Categorical (Yes/No)    |
| <b>Metabolism</b>   | CYP1A2 inhibitor            | <b>Yes</b>    | Categorical (Yes/No)    |
| <b>Metabolism</b>   | CYP2C19 inhibitor           | <b>No</b>     | Categorical (Yes/No)    |
| <b>Metabolism</b>   | CYP2C9 inhibitor            | <b>No</b>     | Categorical (Yes/No)    |
| <b>Metabolism</b>   | CYP2D6 inhibitor            | <b>No</b>     | Categorical (Yes/No)    |
| <b>Metabolism</b>   | CYP3A4 inhibitor            | <b>No</b>     | Categorical (Yes/No)    |
| <b>Excretion</b>    | Total Clearance             | <b>0.279</b>  | Numeric (log ml/min/kg) |
| <b>Excretion</b>    | Renal OCT2 substrate        | <b>No</b>     | Categorical (Yes/No)    |
| <b>Toxicity</b>     | AMES toxicity               | <b>Yes</b>    | Categorical (Yes/No)    |
| <b>Toxicity</b>     | Max. tolerated dose (human) | <b>-0.636</b> | Numeric (log mg/kg/day) |
| <b>Toxicity</b>     | hERG I inhibitor            | <b>No</b>     | Categorical (Yes/No)    |

| <b>Descriptor</b> | <b>Value</b>                      |              |                            |
|-------------------|-----------------------------------|--------------|----------------------------|
| <b>Toxicity</b>   | hERG II inhibitor                 | <b>No</b>    | Categorical (Yes/No)       |
| <b>Toxicity</b>   | Oral Rat Acute Toxicity (LD50)    | <b>2.706</b> | Numeric (mol/kg)           |
| <b>Toxicity</b>   | Oral Rat Chronic Toxicity (LOAEL) | <b>1.237</b> | Numeric (log mg/kg_bw/day) |
| <b>Toxicity</b>   | Hepatotoxicity                    | <b>Yes</b>   | Categorical (Yes/No)       |
| <b>Toxicity</b>   | Skin Sensitisation                | <b>No</b>    | Categorical (Yes/No)       |
| <b>Toxicity</b>   | <i>T.Pyriiformis</i> toxicity     | <b>1.039</b> | Numeric (log ug/L)         |
| <b>Toxicity</b>   | Minnow toxicity                   | <b>2.615</b> | Numeric (log mM)           |

### 3.8 ADMET Profile of Sorafenib

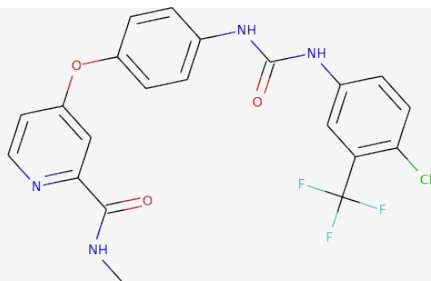

Molecule properties:

| Descriptor       | Value   |
|------------------|---------|
| Molecular Weight | 464.831 |
| LogP             | 5.5497  |
| #Rotatable Bonds | 5       |
| #Acceptors       | 4       |
| #Donors          | 3       |
| Surface Area     | 185.111 |

| Property          | Model Name                    | Predicted Value | Unit                                        |
|-------------------|-------------------------------|-----------------|---------------------------------------------|
| <b>Absorption</b> | Water solubility              | <b>-4.888</b>   | Numeric (log mol/L)                         |
| <b>Absorption</b> | Caco2 permeability            | <b>0.613</b>    | Numeric (log Papp in 10 <sup>-6</sup> cm/s) |
| <b>Absorption</b> | Intestinal absorption (human) | <b>84.731</b>   | Numeric (% Absorbed)                        |
| <b>Absorption</b> | Skin Permeability             | <b>-2.776</b>   | Numeric (log Kp)                            |

| <b>Descriptor</b>   | <b>Value</b>                |               |                      |
|---------------------|-----------------------------|---------------|----------------------|
| <b>Absorption</b>   | P-glycoprotein substrate    | <b>Yes</b>    | Categorical (Yes/No) |
| <b>Absorption</b>   | P-glycoprotein I inhibitor  | <b>Yes</b>    | Categorical (Yes/No) |
| <b>Absorption</b>   | P-glycoprotein II inhibitor | <b>Yes</b>    | Categorical (Yes/No) |
| <b>Distribution</b> | VDss (human)                | <b>-0.233</b> | Numeric (log L/kg)   |
| <b>Distribution</b> | Fraction unbound (human)    | <b>0.058</b>  | Numeric (Fu)         |
| <b>Distribution</b> | BBB permeability            | <b>-1.682</b> | Numeric (log BB)     |
| <b>Distribution</b> | CNS permeability            | <b>-1.995</b> | Numeric (log PS)     |
| <b>Metabolism</b>   | CYP2D6 substrate            | <b>No</b>     | Categorical (Yes/No) |
| <b>Metabolism</b>   | CYP3A4 substrate            | <b>Yes</b>    | Categorical (Yes/No) |
| <b>Metabolism</b>   | CYP1A2 inhibitor            | <b>Yes</b>    | Categorical (Yes/No) |
| <b>Metabolism</b>   | CYP2C19 inhibitor           | <b>Yes</b>    | Categorical (Yes/No) |
| <b>Metabolism</b>   | CYP2C9 inhibitor            | <b>Yes</b>    | Categorical (Yes/No) |
| <b>Metabolism</b>   | CYP2D6 inhibitor            | <b>No</b>     | Categorical (Yes/No) |

| Descriptor        | Value                             |               |                            |
|-------------------|-----------------------------------|---------------|----------------------------|
| <b>Metabolism</b> | CYP3A4 inhibitor                  | <b>Yes</b>    | Categorical (Yes/No)       |
| <b>Excretion</b>  | Total Clearance                   | <b>-0.212</b> | Numeric (log ml/min/kg)    |
| <b>Excretion</b>  | Renal OCT2 substrate              | <b>No</b>     | Categorical (Yes/No)       |
| <b>Toxicity</b>   | AMES toxicity                     | <b>No</b>     | Categorical (Yes/No)       |
| <b>Toxicity</b>   | Max. tolerated dose (human)       | <b>0.677</b>  | Numeric (log mg/kg/day)    |
| <b>Toxicity</b>   | hERG I inhibitor                  | <b>No</b>     | Categorical (Yes/No)       |
| <b>Toxicity</b>   | hERG II inhibitor                 | <b>Yes</b>    | Categorical (Yes/No)       |
| <b>Toxicity</b>   | Oral Rat Acute Toxicity (LD50)    | <b>2.595</b>  | Numeric (mol/kg)           |
| <b>Toxicity</b>   | Oral Rat Chronic Toxicity (LOAEL) | <b>1.054</b>  | Numeric (log mg/kg_bw/day) |
| <b>Toxicity</b>   | Hepatotoxicity                    | <b>Yes</b>    | Categorical (Yes/No)       |
| <b>Toxicity</b>   | Skin Sensitisation                | <b>No</b>     | Categorical (Yes/No)       |
| <b>Toxicity</b>   | <i>T.Pyriformis</i> toxicity      | <b>0.349</b>  | Numeric (log ug/L)         |
| <b>Toxicity</b>   | Minnow toxicity                   | <b>-0.421</b> | Numeric (log mM)           |
